# Supplementary material for: Selective two-photon absorption in carbon dots: a piece of the photoluminescence emission puzzle
Source: Royal Society of Chemistry journal article supplement (doi:10.1039/c8nr03365j), 2018-01-01
Supplement: c8nr03365j1.pdf [file c8nr03365j1.pdf]

## Electronic Supplementary Information

### Selective Two-Photon Absorption in Carbon Dots: an extra piece of the puzzle of photoluminescence emission

*Carla, I. M. Santos,<sup>a,b\*</sup> Inês F. A. Mariz,<sup>a</sup>, Sandra N. Pinto,<sup>a,c</sup> Gil Gonçalves,<sup>d</sup> Igor Bdikin,<sup>d</sup>  
Paula A.A.P. Marques,<sup>d</sup> Maria Graça P.M.S. Neves,<sup>b</sup> José M. G. Martinho,<sup>a</sup> and Ermelinda M.  
S. Maçôas.<sup>a\*</sup>*

<sup>a</sup> CQFM, Centro de Química-Física Molecular, IN—Institute of Nanosciences and  
Nanotechnology and CQE, Centro de Química Estrutural, Instituto Superior Técnico, 1049-001  
Lisboa,

<sup>b</sup> QOPNA, Chemistry Department, University of Aveiro, Campus Universitario de Santiago,  
3810-193 Aveiro, Portugal

<sup>c</sup> iBB-Institute for Bioengineering and Biosciences, Department of Bioengineering, Instituto  
Superior Técnico, Universidade de Lisboa, Av. Rovisco Pais 1049-001 Lisboa, Portugal.

<sup>d</sup> TEMA-Nanotechnology Research Group, Mechanical Engineering Department, University of  
Aveiro, Campus Universitario de Santiago, 3810-193 Aveiro, Portugal

Email: cims@ua.pt (Carla Santos); ermelinda.macoas@tecnico.ulisboa.pt (Ermelinda Maçôas)

## Contents

|                                                                                                                                                                   |    |
|-------------------------------------------------------------------------------------------------------------------------------------------------------------------|----|
| <b>Table S1.</b> Survey of the literature reporting two-photon absorption cross-section values.....                                                               | S1 |
| <b>Table S2 -</b> Atomic percentage from the high resolution XPS .....                                                                                            | S2 |
| <b>Figure S1.</b> XPS survey spectra .....                                                                                                                        | S2 |
| <b>Figure S2.</b> Optical properties of the Cdots in b1 and b2 .....                                                                                              | S3 |
| <b>Figure S3.</b> Excitation wavelength dependence of the quantum yield and emission wavelength dependence of the average lifetime .....                          | S4 |
| <b>Figure S4.</b> Emission spectrum upon excitation at different wavelengths and photoexcitation spectrum collected at different emission wavelength for b3 ..... | S5 |
| <b>Figure S5.</b> Optical properties and size distribution of undoped dots .....                                                                                  | S6 |
| <b>References</b> .....                                                                                                                                           | S7 |

**Table S1.** Survey of the literature reporting two-photon absorption cross-section values. A description of the starting material and the absorption spectrum is given together with the maximum emission wavelength ( $\lambda_{em}$ ), emission quantum yield ( $\phi_F$ ), width (W) and height (H) of the dots and their reported two-photon absorption cross-section (TPA).

| Type of Cdots                       | Starting material and procedure in brief                                             | ref           | Abs (nm)                                           | $\lambda_{em}$ (nm) | $\phi_F$ (%)                       | Width and Height (nm) | TPA ( $10^3$ GM)  |
|-------------------------------------|--------------------------------------------------------------------------------------|---------------|----------------------------------------------------|---------------------|------------------------------------|-----------------------|-------------------|
| <b>N-doped crystalline</b>          | GO and DMF (200°C, 4.5h)                                                             | <sup>1</sup>  | unstructured (PLEx 370 nm)                         | 520                 | 31                                 | 2-3 (W)<br>1.5 (H)    | 48                |
| <b>N-doped crystalline</b>          | GO and DMF (250°C, 6h)                                                               | <sup>2</sup>  | Not reported                                       | 550                 | 32                                 | 2-3(W)                | 40                |
| <b>N-doped crystalline</b>          | laser ablation of a carbon target in water vapor and post-functionalization with PEG | <sup>3</sup>  | unstructured                                       | 480                 | 4-10                               | 9 (W)<br><5 (H)       | 39                |
| <b>N-doped amorphous</b>            | Citric acid and hyperbranched poly-(amino amine) (HPAA) (200°C, 3h)                  | <sup>4</sup>  | unstructured with peaks at 285 nm and 370 nm       | 450                 | 17                                 | 10 (W)                | 16                |
| <b>N-doped</b>                      | Melamine and glycerol in acidic solution (270°C, 15 min).                            | <sup>5</sup>  | unstructured                                       | 400-500             | 5-22                               | 0.8-1.5 (W)           | 1.3-2.0           |
| <b>g-C<sub>3</sub>N<sub>4</sub></b> | Acid treatment of bulk g-C <sub>3</sub> N <sub>4</sub>                               | <sup>6</sup>  | unstructured                                       | 406                 | -                                  | 4 (W)<br>0.35 (H)     | 30                |
| <b>Undoped</b>                      | Graphite, Hummers method                                                             | <sup>7</sup>  | unstructured                                       | 550                 | $5.8 \times 10^{-4}$ <sup>a)</sup> | 40 (W)                | 31 <sup>a)</sup>  |
| <b>Undoped crystalline</b>          | Oxidation of graphite nanoparticles by Hummers method                                | <sup>8</sup>  | unstructured with shoulder at 260 nm (PLEx 300 nm) | 520                 | 1.2                                | 3 (W)<br>0.8 (H)      | 2.5 <sup>b)</sup> |
| <b>Undoped</b>                      | Citric acid (200°C for 30 min)                                                       | <sup>9</sup>  | Band centered at 360 nm                            | 465                 | 8.2                                | 10 (W)                | 0.022             |
| <b>Undoped</b>                      | Carrot juice (180°C for 5 h)                                                         | <sup>10</sup> | Band at 286 nm                                     | 410                 | 11.5                               | 2-7(W)                | 0.019             |
| <b>S, Se co-doped crystalline</b>   | Hydrothermal treatment of polythiophene and diphenyl diselenide in NaOH              | <sup>11</sup> | Band centered at 526 nm                            | 730                 | 0.2                                | 20 (W)<br>4(H)        | 30                |
| <b>Undoped GO sheets</b>            | Exfoliation of graphite by hummers method                                            | <sup>12</sup> | Not reported                                       | 550                 | 34                                 | large sheet           | 47 <sup>c)</sup>  |

<sup>a)</sup> The quantum yield value is the two-photon emission quantum yield, the absorption cross-section was estimated based on the values of the  $\beta(\lambda)=0.025\text{cm/GW}$  at 800 nm and concentration 0.2 mg/mL <sup>b)</sup>  $\beta(\lambda)=0.01\text{cm/GW}$  at 800 nm, concentration 1mg/mL <sup>a)</sup> and <sup>c)</sup> large dots and GO sheets can have a high TPA due to a high number of embedded  $sp^2$  domains.

**Table S2** - Atomic percentage from the high resolution XPS.

|    | %C   | %O   | %N   | C/O  | N/C  | Namine/Namide |
|----|------|------|------|------|------|---------------|
| GO | 0.61 | 0.39 | -    | 1.55 | -    | -             |
| b1 | 0.63 | 0.33 | 0.04 | 1.90 | 0.07 | 1.2           |
| b2 | 0.60 | 0.31 | 0.10 | 1.93 | 0.16 | 1.1           |
| b3 | 0.64 | 0.28 | 0.08 | 2.31 | 0.13 | 1.2           |

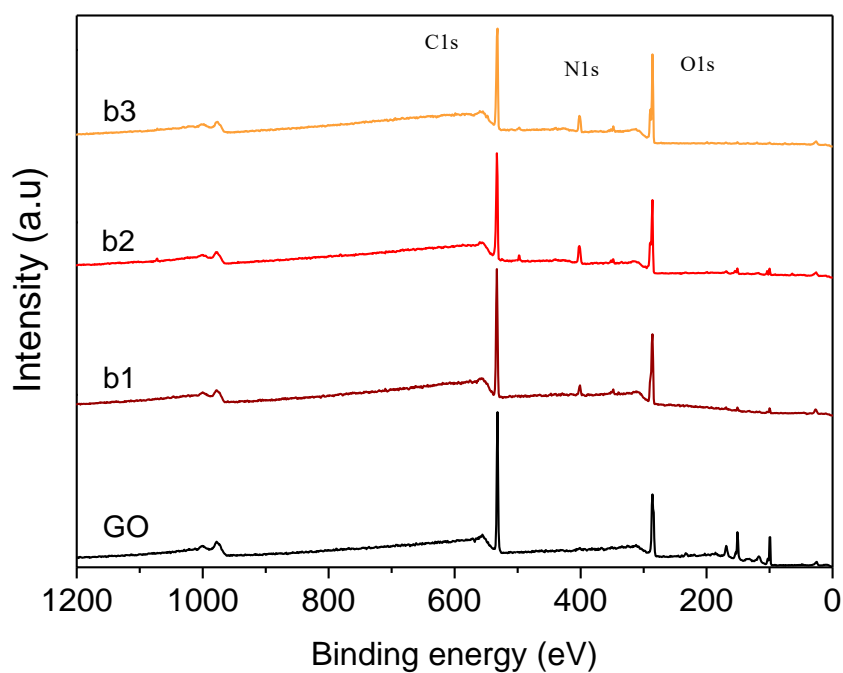

**Figure S1.** XPS survey spectra of the different batches of nitrogen doped Cdots shown in comparison with the GO spectrum. Note that the N1s peak observed on the N-functionalized dots is absent from the XPS spectrum of GO

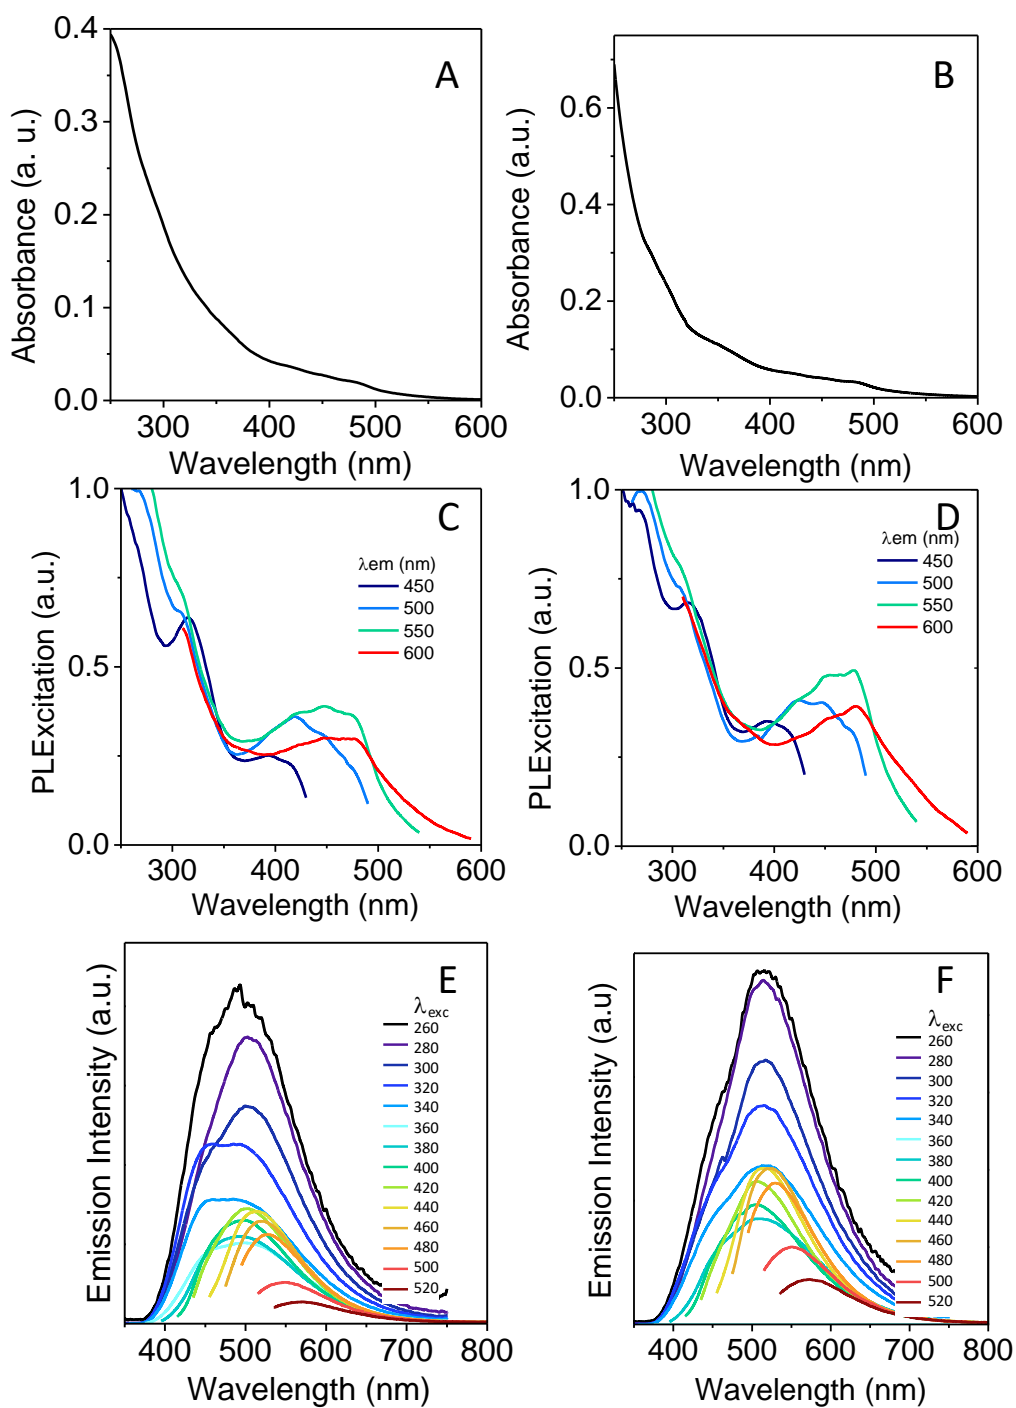

**Figure S2.** Optical properties of the Cdots in b1 (left) and b2 (right). (A and B) absorption spectra of b1 and b2, respectively. (C and D) photoexcitation spectra collected at different emission wavelength ( $\lambda_{em}$ ). (E and F) Emission spectra excited at different wavelengths ( $\lambda_{exc}$ ).

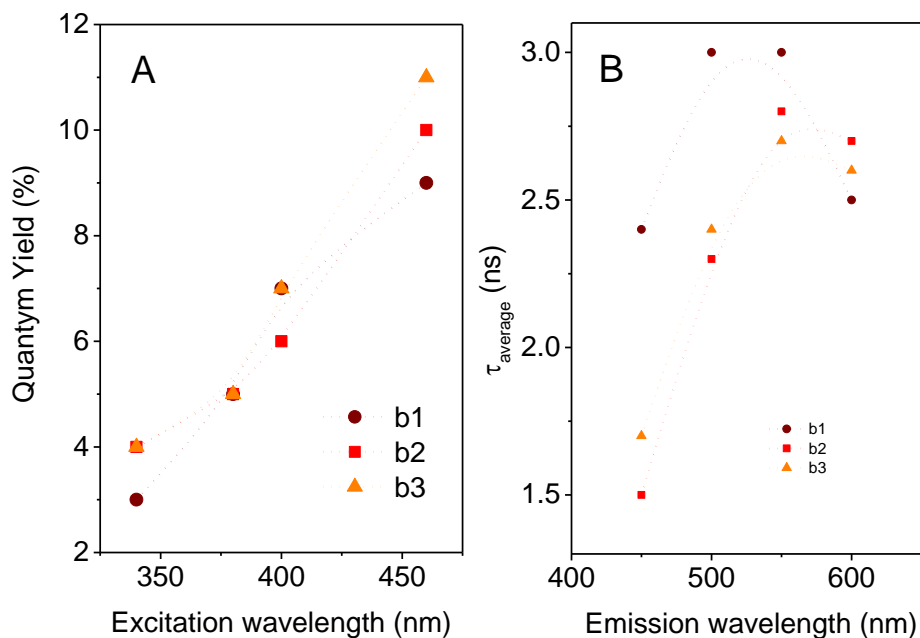

**Figure S3.** Excitation wavelength dependence of the quantum yield (A) and emission wavelength dependence of the average lifetime (B).

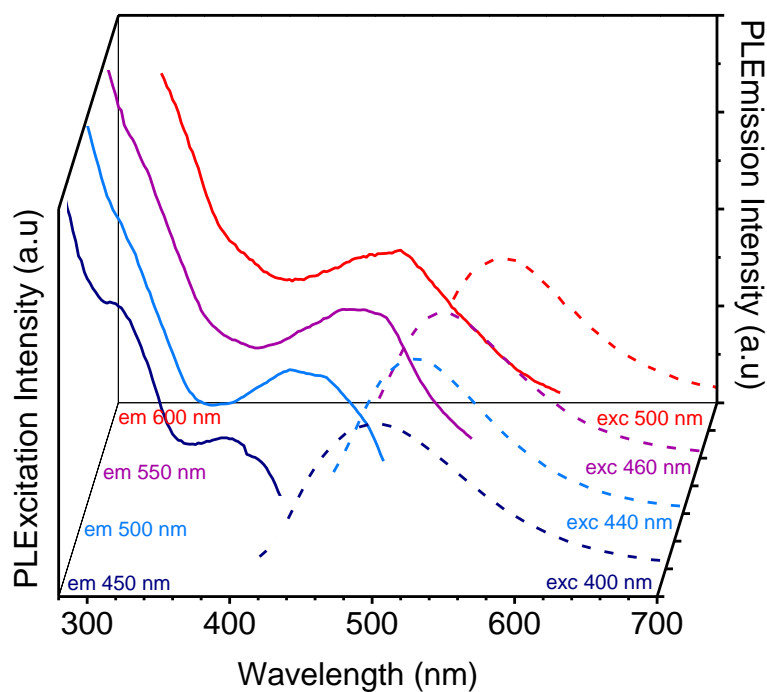

**Figure S4.** Emission spectrum upon excitation at different wavelengths and photoexcitation spectrum collected at different emission wavelength for b3.

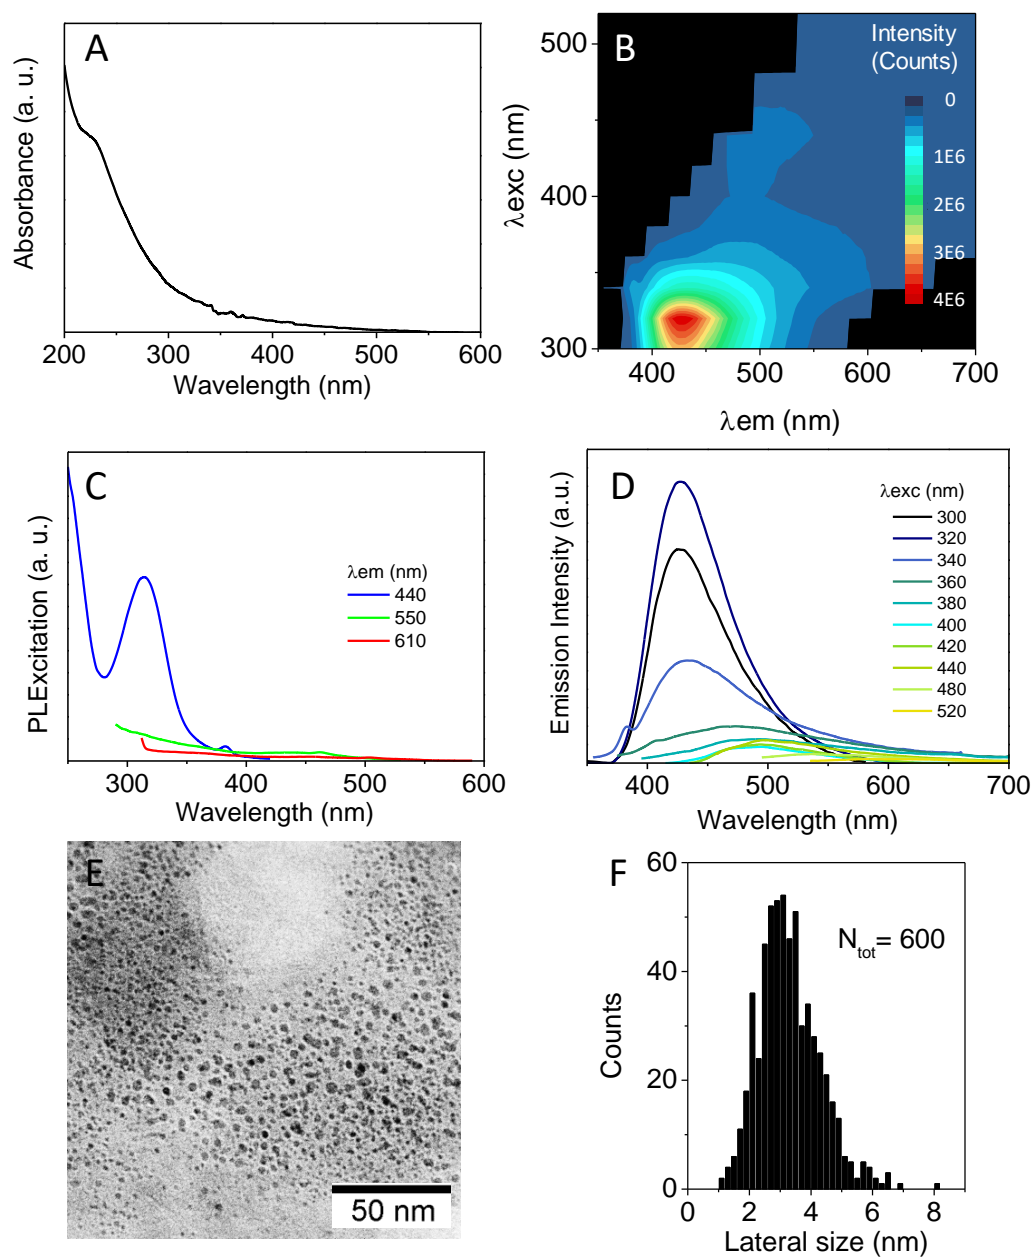

**Figure S5.** Optical properties and size distribution of undoped dots. (A) Absorption spectrum; (B) contour plot showing of the  $\lambda_{exc}$  vs  $\lambda_{em}$ ; (C) photoexcitation spectra collected at different emission wavelength ( $\lambda_{em}$ ), (D) representative TEM image of the undoped dots and (F) size distribution based on the Ferret diameter measured in the TEM images.

## References

1. Q. Liu, B. D. Guo, Z. Y. Rao, B. H. Zhang and J. R. Gong, *Nano Lett.*, 2013, **13**, 2436-2441.
2. Y. L. Shi, A. Pramanik, C. Tchounwou, F. Pedraza, R. A. Crouch, S. R. Chavva, A. Vangara, S. S. Sinha, S. Jones, D. Sardar, C. Hawker and P. C. Ray, *ACS Appl. Mater. Interfaces*, 2015, **7**, 10935-10943.
3. L. Cao, X. Wang, M. J. Mezziani, F. S. Lu, H. F. Wang, P. J. G. Luo, Y. Lin, B. A. Harruff, L. M. Veca, D. Murray, S. Y. Xie and Y. P. Sun, *Journal of the American Chemical Society*, 2007, **129**, 11318-+.
4. G. S. Tong, J. X. Wang, R. B. Wang, X. Q. Guo, L. He, F. Qiu, G. Wang, B. S. Zhu, X. Y. Zhu and T. Liu, *J Mater Chem B*, 2015, **3**, 700-706.
5. C. F. Wang, X. Wu, X. P. Li, W. T. Wang, L. Z. Wang, M. Gu and Q. Li, *Journal of Materials Chemistry*, 2012, **22**, 15522-15525.
6. X. D. Zhang, H. X. Wang, H. Wang, Q. Zhang, J. F. Xie, Y. P. Tian, J. Wang and Y. Xie, *Advanced Materials*, 2014, **26**, 4438-+.
7. J. Qian, D. Wang, F. H. Cai, W. Xi, L. Peng, Z. F. Zhu, H. He, M. L. Hu and S. L. He, *Angewandte Chemie-International Edition*, 2012, **51**, 10570-10575.
8. H. D. Ha, M. H. Jang, F. Liu, Y. H. Cho and T. S. Seo, *Carbon*, 2015, **81**, 367-375.
9. A. W. Zhu, C. Q. Ding and Y. Tian, *Scientific Reports*, 2013, **3**.
10. H. Jin, R. J. Gui, Y. F. Wang and J. Sun, *Talanta*, 2017, **169**, 141-148.
11. M. Lan, S. Zhao, Z. Zhang, L. Yan, L. Guo, G. Niu, J. Zhang, J. Zhao, H. Zhang, P. Wang, G. Zhu, Lee, Chun-Sing and W. Zhang, *Nano Res.*, 2017.
12. A. Pramanik, Z. Fan, S. R. Chavva, S. S. Sinha and P. C. Ray, *Scientific Reports*, 2014, **4**.
